# Supplementary material for: Microbial recognition by GEF-H1 controls IKKε mediated activation of IRF5
Source: PubMed Central journal article supplement (PMC6430831; doi:10.1038/s41467-019-09283-x), 2019-03-22
Supplement: 41467_2019_9283_MOESM1_ESM.pdf [file 41467_2019_9283_MOESM1_ESM.pdf]

## **Supplementary Information**

### **Microbial Recognition by GEF-H1 Controls IKK $\epsilon$ Mediated Activation of IRF5**

Yun Zhao et al.

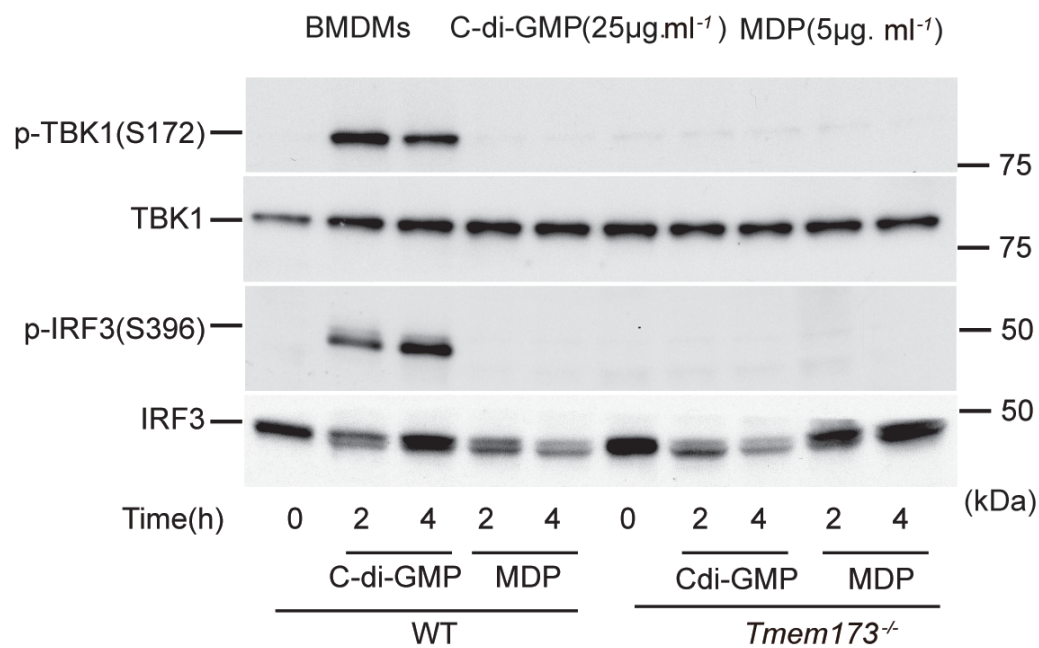

Supplementary Figure 1: MDP cannot induce TBK1 and IRF3 phosphorylation in macrophages.

Related to Figure 1

WT or STING deficient bone-marrow derived macrophages were stimulated with either C-di-GMP or N-glycolyl-MDP for the indicated time period and phosphorylation and expression of IRF3 and TBK1 determined by Western blotting.

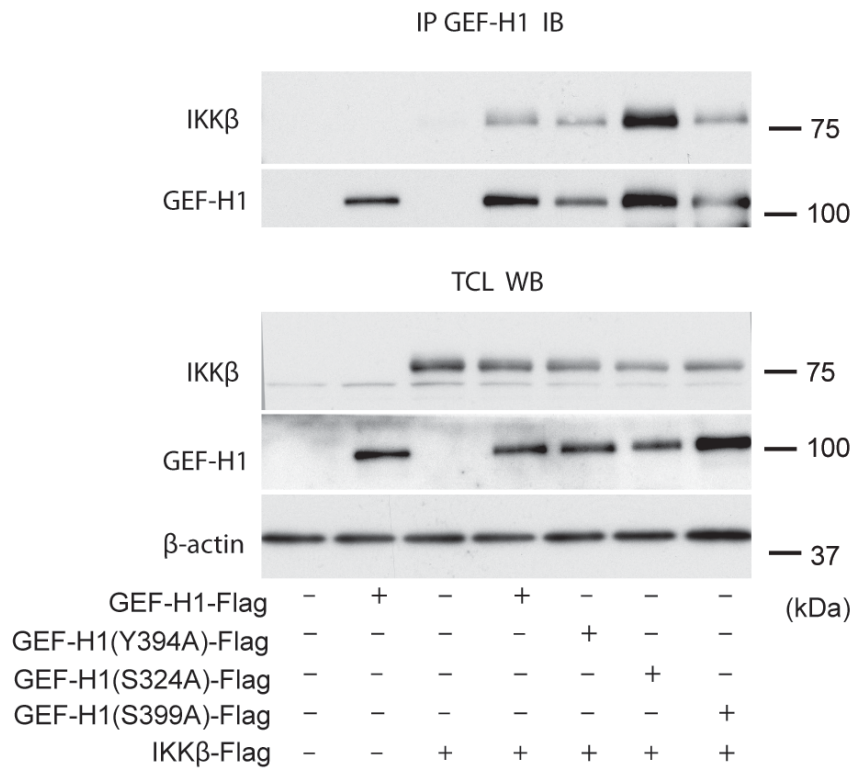

Supplementary Figure 2: GEF-H1 interacts with IKKβ

Related to Figure 3

WT or GEF-H1 variants and IKKβ were co-expressed in HEK293T cells, GEF-H1 pulled down with anti GEF-H1 and co-immunoprecipitated IKKβ detected by Western blotting.

Supplementary Table 1:

Primers used in this study

| Genes           | Forward 5' to 3'       | Reverse 5' to 3'       |
|-----------------|------------------------|------------------------|
| <i>18S</i>      | GTAACCCGTTGAACCCCAT    | CCATCCAATCGGTAGTAGCG   |
| <i>Pglyrp1</i>  | TGTGCAAAGCACTCTCTCTC   | TCACTAGGTCTCAAGGTCTCTC |
| <i>GzmD</i>     | TGATTCTCCTGACCCTACTTCT | CAGGAAGCCTCCACAGTATATC |
| <i>GzmE</i>     | GAGATACTGTGGAGGCTTCTTG | CCTCCTTAGCCTTGATGTTGT  |
| <i>Serpine1</i> | GAGGTGGAAAGAGCCAGATTTA | CCACTGAAGTAGAGGGCATTTC |
| <i>NOD2</i>     | AGCCCTGGCTGAAGTTGTAG   | TTGAGTCCTTCTGCGAGAGA   |
