# Supplementary material for: Microbial recognition by GEF-H1 controls IKKε mediated activation of IRF5
Source: PubMed Central journal article supplement (PMC6430831; doi:10.1038/s41467-019-09283-x), 2019-03-22
Supplement: 41467_2019_9283_MOESM3_ESM.pdf [file 41467_2019_9283_MOESM3_ESM.pdf]

## Description of Additional Supplementary Files

### Supplementary Data 1

Related to Figure 5, Gene clusters that were either dependent on GEF-H1 and IRF5, GEF-H1 or IRF5 alone or that were induced by MDP independently of GEF-H1 and IRF5.
